# Supplementary material for: Neuroserpin polymers cause oxidative stress in a neuronal model of the dementia FENIB
Source: PubMed Central journal article supplement — Neurobiol Dis. 2017 Jul;103:32–44. doi: 10.1016/j.nbd.2017.03.010 (PMC5439028; doi:10.1016/j.nbd.2017.03.010), 2017-07
Supplement: mmc2.pdf [file mmc2.pdf]

| <b>Name</b>           | <b>Forward primer (5'-3')</b> | <b>Reverse primer (5'-3')</b> |
|-----------------------|-------------------------------|-------------------------------|
| <b><i>Serpil1</i></b> | GCTGGTGGTATCTACCAAGTCC        | CTTCACAGAGTTTGCCCATTC         |
| <b><i>Prdx6</i></b>   | TATCCTCTACCCTGCCACCA          | TACCATCACGCTCTCTCCCT          |
| <b><i>Aldh1b1</i></b> | GCTCCGTGACATCTAGCCAG          | GCCACCGTCTCTGCTTTAAGT         |
| <b><i>Scara3</i></b>  | GGACACACACCACGGAGAAA          | GGTCCTCTGCTACCAACAGG          |
| <b><i>Gstm1</i></b>   | AGTACCGTATGTTTGAGCCCA         | CCAGTGGGCCATCTTTGAAAA         |
| <b><i>Apoe</i></b>    | AGTGGAAGACATGCATCGCC          | TGTTGCAGGACAGGAGAAGG          |
| <b><i>Sod2</i></b>    | CTTCAATAAGGAGCAAGGTCGC        | CCCACACGTCAATCCCCAG           |
| <b><i>Gpx1</i></b>    | CCGCCGCTTTTCGTACCAT           | CCCAGAGTGCAGCCAGTAAT          |
| <b><i>Cat</i></b>     | CGCCTGTGTGAGAACATTGC          | TCAGCGTTGTACTTGTCCAGA         |
| <b><i>Eef1a1</i></b>  | AGCTGGCAAAGTCACCAAGT          | CCGTTCTTCCACCACTGATT          |
| <b><i>Rpl19</i></b>   | AGACCAAGGAAGCACGAAAG          | GCCGCTATGTACAGACACGA          |

**Supplementary table 2.** List of primers used in this study for real-time RT-PCR analyses.
